# Supplementary material for: Identifying potentially low value surgical care: A national ecological study in England
Source: PubMed Central journal article supplement (PMC11346124; doi:10.1177/13558196241252053), 2024-05-09
Supplement: sj-pdf-1-hsr-10.1177_13558196241252053.pdf [file sj-pdf-1-hsr-10.1177_13558196241252053.pdf]

## Contents

|                                                                                                                                                                                      |    |
|--------------------------------------------------------------------------------------------------------------------------------------------------------------------------------------|----|
| Table S1: Procedures included in the study and their 'Abbott' category of surgical complexity ...                                                                                    | 2  |
| Table S2. Search strategies used for targeted literature reviews for the 10 identified procedures .....                                                                              | 13 |
| Table S3. The most common primary procedures and primary diagnoses recorded for each of the 10 included 'restrictive' procedures.....                                                | 18 |
| Table S4. Evidence of clinical and cost-effectiveness relating to highlighted procedures and related NICE guidance.....                                                              | 20 |
| Figure S1. Variation in standardised rates of connection of stomach to transposed jejunum (G32) by CCG in 2018/19.....                                                               | 26 |
| Figure S2. Variation in standardised rates of denervation of spinal facet joint of vertebra (V48) by CCG in 2018/19 .....                                                            | 27 |
| Figure S3. Variation in standardised rates of total prosthetic replacement of knee joint not using cement (W41) by CCG in 2018/19 .....                                              | 28 |
| Figure S4. Variation in standardised rates of hybrid prosthetic replacement of hip joint using cemented acetabular component (W93) by CCG in 2018/19.....                            | 29 |
| Figure S5. National procedure rates (2018/19), growth in procedure rates (2014/15-2018/19), and geographic variation in procedure rates (2018/19) for 'inclusive' procedures.....    | 30 |
| Figure S6. National procedure rates (2018/19), growth in procedure rates (2014/15-2018/19), and geographic variation in procedure rates (2018/19) for 'intermediate' procedures..... | 31 |
| Methods S1. Systematic component of variance. ....                                                                                                                                   | 32 |

Table S1: Procedures included in the study and their 'Abbott' category of surgical complexity

| <b>Procedure Code</b> | <b>Procedure Description</b>                   | <b>Abbott Category</b> |
|-----------------------|------------------------------------------------|------------------------|
| A02                   | Excision of lesion of tissue of brain          | Restrictive            |
| A09                   | Neurostimulation of brain                      | Restrictive            |
| A12                   | Creation of connection from ventricle of brain | Restrictive            |
| A41                   | Drainage of subdural space                     | Restrictive            |
| A48                   | Other operations on spinal cord                | Restrictive            |
| A57                   | Operations on spinal nerve root                | Restrictive            |
| B08                   | Excision of thyroid gland                      | Restrictive            |
| B12                   | Other operations on thyroid gland              | Restrictive            |
| B14                   | Excision of parathyroid gland                  | Restrictive            |
| B27                   | Total excision of breast                       | Restrictive            |
| B28                   | Other excision of breast                       | Restrictive            |
| B29                   | Reconstruction of breast                       | Restrictive            |
| D10                   | Exenteration of mastoid air cells              | Restrictive            |
| E13                   | Other operations on maxillary antrum           | Restrictive            |
| E42                   | Exteriorisation of trachea                     | Restrictive            |
| E54                   | Excision of lung                               | Restrictive            |
| E55                   | Open extirpation of lesion of lung             | Restrictive            |
| E59                   | Other operations on lung                       | Restrictive            |
| F23                   | Extirpation of lesion of tongue                | Restrictive            |
| F28                   | Extirpation of lesion of palate                | Restrictive            |
| F38                   | Extirpation of lesion of other part of mouth   | Restrictive            |
| G01                   | Excision of oesophagus and stomach             | Restrictive            |
| G21                   | Other operations on oesophagus                 | Restrictive            |
| G23                   | Repair of diaphragmatic hernia                 | Restrictive            |
| G24                   | Antireflux operations                          | Restrictive            |
| G28                   | Partial excision of stomach                    | Restrictive            |
| G30                   | Plastic operations on stomach                  | Restrictive            |
| G32                   | Connection of stomach to transposed jejunum    | Restrictive            |
| G33                   | Other connection of stomach to jejunum         | Restrictive            |
| G34                   | Artificial opening into stomach                | Restrictive            |
| G69                   | Excision of ileum                              | Restrictive            |
| H01                   | Emergency excision of appendix                 | Restrictive            |
| H02                   | Other excision of appendix                     | Restrictive            |
| H06                   | Extended excision of right hemicolon           | Restrictive            |
| H07                   | Other excision of right hemicolon              | Restrictive            |
| H10                   | Excision of sigmoid colon                      | Restrictive            |
| H15                   | Other exteriorisation of colon                 | Restrictive            |
| H30                   | Other operations on colon                      | Restrictive            |
| H33                   | Excision of rectum                             | Restrictive            |
| H41                   | Other operations on rectum through anus        | Restrictive            |
| H46                   | Other operations on rectum                     | Restrictive            |
| H62                   | Other operations on bowel                      | Restrictive            |

| <b>Procedure Code</b> | <b>Procedure Description</b>                                          | <b>Abbott Category</b> |
|-----------------------|-----------------------------------------------------------------------|------------------------|
| J02                   | Partial excision of liver                                             | Restrictive            |
| J18                   | Excision of gall bladder                                              | Restrictive            |
| K25                   | Plastic repair of mitral valve                                        | Restrictive            |
| K26                   | Plastic repair of aortic valve                                        | Restrictive            |
| K40                   | Saphenous vein graft replacement of coronary artery                   | Restrictive            |
| K45                   | Connection of thoracic artery to coronary artery                      | Restrictive            |
| K57                   | Other therapeutic transluminal operations on heart                    | Restrictive            |
| L19                   | Other replacement of aneurysmal segment of aorta                      | Restrictive            |
| L27                   | Transluminal insertion of stent graft for aneurysmal segment of aorta | Restrictive            |
| L29                   | Reconstruction of carotid artery                                      | Restrictive            |
| L59                   | Other bypass of femoral artery                                        | Restrictive            |
| L60                   | Reconstruction of femoral artery                                      | Restrictive            |
| L67                   | Excision of other artery                                              | Restrictive            |
| L70                   | Other open operations on other artery                                 | Restrictive            |
| L74                   | Arteriovenous shunt                                                   | Restrictive            |
| L75                   | Other arteriovenous operations                                        | Restrictive            |
| L79                   | Other operations on vena cava                                         | Restrictive            |
| M01                   | Transplantation of kidney                                             | Restrictive            |
| M02                   | Total excision of kidney                                              | Restrictive            |
| M03                   | Partial excision of kidney                                            | Restrictive            |
| M34                   | Total excision of bladder                                             | Restrictive            |
| M61                   | Open excision of prostate                                             | Restrictive            |
| M73                   | Repair of urethra                                                     | Restrictive            |
| N06                   | Other excision of testis                                              | Restrictive            |
| O17                   | Secondary closed reduction of fracture of bone and internal fixation  | Restrictive            |
| O27                   | Other stabilising operations on joint                                 | Restrictive            |
| O29                   | Excision of bone                                                      | Restrictive            |
| P05                   | Excision of vulva                                                     | Restrictive            |
| P20                   | Extirpation of lesion of vagina                                       | Restrictive            |
| Q01                   | Excision of cervix uteri                                              | Restrictive            |
| Q07                   | Abdominal excision of uterus                                          | Restrictive            |
| Q08                   | Vaginal excision of uterus                                            | Restrictive            |
| Q22                   | Bilateral excision of adnexa of uterus                                | Restrictive            |
| Q23                   | Unilateral excision of adnexa of uterus                               | Restrictive            |
| Q43                   | Partial excision of ovary                                             | Restrictive            |
| S55                   | Exploration of burnt skin of other site                               | Restrictive            |
| T10                   | Therapeutic endoscopic operations on pleura                           | Restrictive            |
| T36                   | Operations on omentum                                                 | Restrictive            |
| T41                   | Other open operations on peritoneum                                   | Restrictive            |
| T52                   | Excision of other fascia                                              | Restrictive            |
| T77                   | Excision of muscle                                                    | Restrictive            |
| T85                   | Block dissection of lymph nodes                                       | Restrictive            |
| V09                   | Reduction of fracture of other bone of face                           | Restrictive            |

| <b>Procedure Code</b> | <b>Procedure Description</b>                                           | <b>Abbott Category</b> |
|-----------------------|------------------------------------------------------------------------|------------------------|
| V10                   | Division of bone of face                                               | Restrictive            |
| V15                   | Reduction of fracture of mandible                                      | Restrictive            |
| V17                   | Fixation of mandible                                                   | Restrictive            |
| V22                   | Primary decompression operations on cervical spine                     | Restrictive            |
| V25                   | Primary decompression operations on lumbar spine                       | Restrictive            |
| V26                   | Revisonal decompression operations on lumbar spine                     | Restrictive            |
| V29                   | Primary excision of cervical intervertebral disc                       | Restrictive            |
| V33                   | Primary excision of lumbar intervertebral disc                         | Restrictive            |
| V38                   | Primary fusion of other joint of spine                                 | Restrictive            |
| V40                   | Stabilisation of spine                                                 | Restrictive            |
| V41                   | Instrumental correction of deformity of spine                          | Restrictive            |
| V44                   | Decompression of fracture of spine                                     | Restrictive            |
| V48                   | Denervation of spinal facet joint of vertebra                          | Restrictive            |
| V54                   | Other operations on spine                                              | Restrictive            |
| V67                   | Other primary decompression operations on lumbar spine                 | Restrictive            |
| W06                   | Total excision of bone                                                 | Restrictive            |
| W08                   | Other excision of bone                                                 | Restrictive            |
| W09                   | Extirpation of lesion of bone                                          | Restrictive            |
| W15                   | Division of bone of foot                                               | Restrictive            |
| W16                   | Other division of bone                                                 | Restrictive            |
| W19                   | Primary open reduction of fracture of bone and intramedullary fixation | Restrictive            |
| W20                   | Primary open reduction of fracture of bone and extramedullary fixation | Restrictive            |
| W21                   | Primary open reduction of intra-articular fracture of bone             | Restrictive            |
| W23                   | Secondary open reduction of fracture of bone                           | Restrictive            |
| W24                   | Closed reduction of fracture of bone and internal fixation             | Restrictive            |
| W25                   | Closed reduction of fracture of bone and external fixation             | Restrictive            |
| W28                   | Other internal fixation of bone                                        | Restrictive            |
| W30                   | Other external fixation of bone                                        | Restrictive            |
| W37                   | Total prosthetic replacement of hip joint using cement                 | Restrictive            |
| W38                   | Total prosthetic replacement of hip joint not using cement             | Restrictive            |
| W39                   | Other total prosthetic replacement of hip joint                        | Restrictive            |
| W40                   | Total prosthetic replacement of knee joint using cement                | Restrictive            |
| W41                   | Total prosthetic replacement of knee joint not using cement            | Restrictive            |
| W42                   | Other total prosthetic replacement of knee joint                       | Restrictive            |
| W46                   | Prosthetic replacement of head of femur using cement                   | Restrictive            |
| W47                   | Prosthetic replacement of head of femur not using cement               | Restrictive            |
| W57                   | Excision reconstruction of joint                                       | Restrictive            |
| W58                   | Other reconstruction of joint                                          | Restrictive            |
| W62                   | Other primary fusion of other joint                                    | Restrictive            |
| W65                   | Primary open reduction of traumatic dislocation of joint               | Restrictive            |
| W67                   | Secondary reduction of traumatic dislocation of joint                  | Restrictive            |
| W80                   | Debridement and irrigation of joint                                    | Restrictive            |
| W93                   | Hybrid prosthetic replacement of hip joint using cemented acetabular   | Restrictive            |

| <b>Procedure Code</b> | <b>Procedure Description</b>                                                | <b>Abbott Category</b> |
|-----------------------|-----------------------------------------------------------------------------|------------------------|
|                       | component                                                                   |                        |
| W94                   | Hybrid prosthetic replacement of hip joint using cemented femoral component | Restrictive            |
| W96                   | Total prosthetic replacement of shoulder joint using cement                 | Restrictive            |
| W97                   | Total prosthetic replacement of shoulder joint not using cement             | Restrictive            |
| X08                   | Amputation of hand                                                          | Restrictive            |
| X09                   | Amputation of leg                                                           | Restrictive            |
| X21                   | Correction of congenital deformity of hand                                  | Restrictive            |
| A60                   | Destruction of peripheral nerve                                             | Intermediate           |
| A61                   | Extirpation of lesion of peripheral nerve                                   | Intermediate           |
| A62                   | Microsurgical repair of peripheral nerve                                    | Intermediate           |
| A64                   | Other repair of peripheral nerve                                            | Intermediate           |
| A65                   | Release of entrapment of peripheral nerve at wrist                          | Intermediate           |
| A67                   | Release of entrapment of peripheral nerve at other site                     | Intermediate           |
| A69                   | Revision of release of peripheral nerve                                     | Intermediate           |
| A70                   | Neurostimulation of peripheral nerve                                        | Intermediate           |
| A73                   | Other operations on peripheral nerve                                        | Intermediate           |
| A81                   | Other operations on sympathetic nerve                                       | Intermediate           |
| A84                   | Neurophysiological operations                                               | Intermediate           |
| B30                   | Prosthesis for breast                                                       | Intermediate           |
| B31                   | Other plastic operations on breast                                          | Intermediate           |
| B33                   | Incision of breast                                                          | Intermediate           |
| B34                   | Operations on duct of breast                                                | Intermediate           |
| B36                   | Reconstruction of nipple and areola                                         | Intermediate           |
| B37                   | Other operations on breast                                                  | Intermediate           |
| C10                   | Operations on eyebrow                                                       | Intermediate           |
| C11                   | Operations on canthus                                                       | Intermediate           |
| C12                   | Extirpation of lesion of eyelid                                             | Intermediate           |
| C13                   | Excision of redundant skin of eyelid                                        | Intermediate           |
| C14                   | Reconstruction of eyelid                                                    | Intermediate           |
| C15                   | Correction of deformity of eyelid                                           | Intermediate           |
| C18                   | Correction of ptosis of eyelid                                              | Intermediate           |
| C22                   | Other operations on eyelid                                                  | Intermediate           |
| C25                   | Connection between lacrimal apparatus and nose                              | Intermediate           |
| C27                   | Operations on nasolacrimal duct                                             | Intermediate           |
| C29                   | Other operations on lacrimal apparatus                                      | Intermediate           |
| C31                   | Combined operations on muscles of eye                                       | Intermediate           |
| C32                   | Recession of muscle of eye                                                  | Intermediate           |
| C39                   | Extirpation of lesion of conjunctiva                                        | Intermediate           |
| C44                   | Other plastic operations on cornea                                          | Intermediate           |
| C45                   | Extirpation of lesion of cornea                                             | Intermediate           |
| C46                   | Plastic operations on cornea                                                | Intermediate           |
| C47                   | Closure of cornea                                                           | Intermediate           |

| <b>Procedure Code</b> | <b>Procedure Description</b>                      | <b>Abbott Category</b> |
|-----------------------|---------------------------------------------------|------------------------|
| C51                   | Other operations on cornea                        | Intermediate           |
| C60                   | Filtering operations on iris                      | Intermediate           |
| C61                   | Other operations on trabecular meshwork of eye    | Intermediate           |
| C62                   | Incision of iris                                  | Intermediate           |
| C65                   | Operations following glaucoma surgery             | Intermediate           |
| C66                   | Extirpation of ciliary body                       | Intermediate           |
| C71                   | Extracapsular extraction of lens                  | Intermediate           |
| C73                   | Incision of capsule of lens                       | Intermediate           |
| C75                   | Prosthesis of lens                                | Intermediate           |
| C79                   | Operations on vitreous body                       | Intermediate           |
| C82                   | Destruction of lesion of retina                   | Intermediate           |
| C85                   | Fixation of retina                                | Intermediate           |
| C86                   | Other operations on eye                           | Intermediate           |
| C89                   | Operations on posterior segment of eye            | Intermediate           |
| D01                   | Excision of external ear                          | Intermediate           |
| D02                   | Extirpation of lesion of external ear             | Intermediate           |
| D03                   | Plastic operations on external ear                | Intermediate           |
| D06                   | Other operations on external ear                  | Intermediate           |
| D13                   | Attachment of bone anchored hearing prosthesis    | Intermediate           |
| D14                   | Repair of eardrum                                 | Intermediate           |
| D15                   | Drainage of middle ear                            | Intermediate           |
| D20                   | Other operations on middle ear                    | Intermediate           |
| D24                   | Operations on cochlea                             | Intermediate           |
| D28                   | Other operations on ear                           | Intermediate           |
| E02                   | Plastic operations on nose                        | Intermediate           |
| E03                   | Operations on septum of nose                      | Intermediate           |
| E04                   | Operations on turbinate of nose                   | Intermediate           |
| E05                   | Surgical arrest of bleeding from internal nose    | Intermediate           |
| E07                   | Other plastic operations on nose                  | Intermediate           |
| E08                   | Other operations on internal nose                 | Intermediate           |
| E09                   | Operations on external nose                       | Intermediate           |
| E14                   | Operations on frontal sinus                       | Intermediate           |
| E20                   | Operations on adenoid                             | Intermediate           |
| E34                   | Microtherapeutic endoscopic operations on larynx  | Intermediate           |
| E35                   | Other therapeutic endoscopic operations on larynx | Intermediate           |
| E63                   | Diagnostic endoscopic examination of mediastinum  | Intermediate           |
| F02                   | Extirpation of lesion of lip                      | Intermediate           |
| F05                   | Other repair of lip                               | Intermediate           |
| F06                   | Other operations on lip                           | Intermediate           |
| F09                   | Surgical removal of tooth                         | Intermediate           |
| F18                   | Excision of dental lesion of jaw                  | Intermediate           |
| F24                   | Incision of tongue                                | Intermediate           |
| F26                   | Other operations on tongue                        | Intermediate           |

| <b>Procedure Code</b> | <b>Procedure Description</b>                                                              | <b>Abbott Category</b> |
|-----------------------|-------------------------------------------------------------------------------------------|------------------------|
| F32                   | Other operations on palate                                                                | Intermediate           |
| F34                   | Excision of tonsil                                                                        | Intermediate           |
| F36                   | Other operations on tonsil                                                                | Intermediate           |
| F42                   | Other operations on mouth                                                                 | Intermediate           |
| F44                   | Excision of salivary gland                                                                | Intermediate           |
| F48                   | Other operations on salivary gland                                                        | Intermediate           |
| G75                   | Attention to artificial opening into ileum                                                | Intermediate           |
| H44                   | Manipulation of rectum                                                                    | Intermediate           |
| H48                   | Excision of lesion of anus                                                                | Intermediate           |
| H51                   | Excision of haemorrhoid                                                                   | Intermediate           |
| H52                   | Destruction of haemorrhoid                                                                | Intermediate           |
| H55                   | Other operations on perianal region                                                       | Intermediate           |
| H56                   | Other operations on anus                                                                  | Intermediate           |
| H58                   | Drainage through perineal region                                                          | Intermediate           |
| H59                   | Excision of pilonidal sinus                                                               | Intermediate           |
| H60                   | Other operations on pilonidal sinus                                                       | Intermediate           |
| J10                   | Transluminal operations on blood vessel of liver                                          | Intermediate           |
| J12                   | Other therapeutic percutaneous operations on liver                                        | Intermediate           |
| J13                   | Diagnostic percutaneous operations on liver                                               | Intermediate           |
| K59                   | Cardioverter defibrillator introduced through the vein                                    | Intermediate           |
| K60                   | Cardiac pacemaker system introduced through vein                                          | Intermediate           |
| K62                   | Therapeutic transluminal operations on heart                                              | Intermediate           |
| K65                   | Catheterisation of heart                                                                  | Intermediate           |
| K73                   | Other cardiac pacemaker system introduced through vein                                    | Intermediate           |
| K75                   | Percutaneous transluminal balloon angioplasty and insertion of stent into coronary artery | Intermediate           |
| L35                   | Transluminal operations on cerebral artery                                                | Intermediate           |
| L54                   | Transluminal operations on iliac artery                                                   | Intermediate           |
| L63                   | Transluminal operations on femoral artery                                                 | Intermediate           |
| L66                   | Other therapeutic transluminal operations on artery                                       | Intermediate           |
| L71                   | Therapeutic transluminal operations on other artery                                       | Intermediate           |
| L84                   | Combined operations on varicose vein of leg                                               | Intermediate           |
| L86                   | Injection into varicose vein of leg                                                       | Intermediate           |
| L87                   | Other operations on varicose vein of leg                                                  | Intermediate           |
| L88                   | Transluminal operations on varicose vein of leg                                           | Intermediate           |
| L91                   | Other vein related operations                                                             | Intermediate           |
| L94                   | Therapeutic transluminal operations on vein                                               | Intermediate           |
| L99                   | Other therapeutic transluminal operations on vein                                         | Intermediate           |
| M09                   | Therapeutic endoscopic operations on calculus of kidney                                   | Intermediate           |
| M13                   | Percutaneous puncture of kidney                                                           | Intermediate           |
| M16                   | Other operations on kidney                                                                | Intermediate           |
| M27                   | Therapeutic ureteroscopic operations on ureter                                            | Intermediate           |
| M28                   | Other endoscopic removal of calculus from ureter                                          | Intermediate           |

| <b>Procedure Code</b> | <b>Procedure Description</b>                                      | <b>Abbott Category</b> |
|-----------------------|-------------------------------------------------------------------|------------------------|
| M29                   | Other therapeutic endoscopic operations on ureter                 | Intermediate           |
| M33                   | Percutaneous ureteric stent procedures                            | Intermediate           |
| M38                   | Open drainage of bladder                                          | Intermediate           |
| M42                   | Endoscopic extirpation of lesion of bladder                       | Intermediate           |
| M43                   | Endoscopic operations to increase capacity of bladder             | Intermediate           |
| M44                   | Other therapeutic endoscopic operations on bladder                | Intermediate           |
| M49                   | Other operations on bladder                                       | Intermediate           |
| M56                   | Therapeutic endoscopic operations on outlet of female bladder     | Intermediate           |
| M65                   | Endoscopic resection of outlet of male bladder                    | Intermediate           |
| M66                   | Other therapeutic endoscopic operations on outlet of male bladder | Intermediate           |
| M70                   | Other operations on outlet of male bladder                        | Intermediate           |
| M76                   | Therapeutic endoscopic operations on urethra                      | Intermediate           |
| M79                   | Other operations on urethra                                       | Intermediate           |
| M81                   | Operations on urethral orifice                                    | Intermediate           |
| N01                   | Extirpation of scrotum                                            | Intermediate           |
| N03                   | Other operations on scrotum                                       | Intermediate           |
| N07                   | Extirpation of lesion of testis                                   | Intermediate           |
| N08                   | Bilateral placement of testes in scrotum                          | Intermediate           |
| N09                   | Other placement of testis in scrotum                              | Intermediate           |
| N11                   | Operations on hydrocele sac                                       | Intermediate           |
| N13                   | Other operations on testis                                        | Intermediate           |
| N15                   | Operations on epididymis                                          | Intermediate           |
| N17                   | Excision of vas deferens                                          | Intermediate           |
| N19                   | Operations on varicocele                                          | Intermediate           |
| N27                   | Extirpation of lesion of penis                                    | Intermediate           |
| N28                   | Plastic operations on penis                                       | Intermediate           |
| N30                   | Operations on prepuce                                             | Intermediate           |
| N32                   | Other operations on penis                                         | Intermediate           |
| O01                   | Transluminal coil embolisation of aneurysm of artery              | Intermediate           |
| P03                   | Operations on Bartholin gland                                     | Intermediate           |
| P06                   | Extirpation of lesion of vulva                                    | Intermediate           |
| P09                   | Other operations on vulva                                         | Intermediate           |
| P13                   | Other operations on female perineum                               | Intermediate           |
| P23                   | Other repair of prolapse of vagina                                | Intermediate           |
| P29                   | Other operations on vagina                                        | Intermediate           |
| Q02                   | Destruction of lesion of cervix uteri                             | Intermediate           |
| Q09                   | Other open operations on uterus                                   | Intermediate           |
| Q10                   | Curettage of uterus                                               | Intermediate           |
| Q11                   | Other evacuation of contents of uterus                            | Intermediate           |
| Q16                   | Other vaginal operations on uterus                                | Intermediate           |
| Q17                   | Therapeutic endoscopic operations on uterus                       | Intermediate           |
| Q20                   | Other operations on uterus                                        | Intermediate           |
| Q35                   | Endoscopic bilateral occlusion of fallopian tubes                 | Intermediate           |



| <b>Procedure Code</b> | <b>Procedure Description</b>                          | <b>Abbott Category</b> |
|-----------------------|-------------------------------------------------------|------------------------|
| Q41                   | Other operations on fallopian tube                    | Intermediate           |
| Q49                   | Therapeutic endoscopic operations on ovary            | Intermediate           |
| Q54                   | Operations on other ligament of uterus                | Intermediate           |
| R12                   | Operations on gravid uterus                           | Intermediate           |
| R17                   | Elective caesarean delivery                           | Intermediate           |
| R18                   | Other caesarean delivery                              | Intermediate           |
| S05                   | Microscopically controlled excision of lesion of skin | Intermediate           |
| S06                   | Other excision of lesion of skin                      | Intermediate           |
| S35                   | Split autograft of skin                               | Intermediate           |
| S41                   | Suture of skin of head or neck                        | Intermediate           |
| S42                   | Suture of skin of other site                          | Intermediate           |
| S47                   | Opening of skin                                       | Intermediate           |
| S56                   | Exploration of other skin of head or neck             | Intermediate           |
| S57                   | Exploration of other skin of other site               | Intermediate           |
| S60                   | Other operations on skin                              | Intermediate           |
| S62                   | Other operations on subcutaneous tissue               | Intermediate           |
| S64                   | Extirpation of nail bed                               | Intermediate           |
| S66                   | Other operations on nail bed                          | Intermediate           |
| S68                   | Excision of nail                                      | Intermediate           |
| S70                   | Other operations on nail                              | Intermediate           |
| T12                   | Puncture of pleura                                    | Intermediate           |
| T19                   | Simple excision of inguinal hernial sac               | Intermediate           |
| T20                   | Primary repair of inguinal hernia                     | Intermediate           |
| T21                   | Repair of recurrent inguinal hernia                   | Intermediate           |
| T22                   | Primary repair of femoral hernia                      | Intermediate           |
| T24                   | Primary repair of umbilical hernia                    | Intermediate           |
| T25                   | Primary repair of incisional hernia                   | Intermediate           |
| T26                   | Repair of recurrent incisional hernia                 | Intermediate           |
| T27                   | Repair of other hernia of abdominal wall              | Intermediate           |
| T31                   | Other operations on anterior abdominal wall           | Intermediate           |
| T42                   | Therapeutic endoscopic operations on peritoneum       | Intermediate           |
| T43                   | Diagnostic endoscopic examination of peritoneum       | Intermediate           |
| T45                   | Image controlled operations on abdominal cavity       | Intermediate           |
| T54                   | Division of fascia                                    | Intermediate           |
| T57                   | Other operations on fascia                            | Intermediate           |
| T59                   | Excision of ganglion                                  | Intermediate           |
| T62                   | Operations on bursa                                   | Intermediate           |
| T64                   | Transposition of tendon                               | Intermediate           |
| T67                   | Primary repair of tendon                              | Intermediate           |
| T69                   | Freeing of tendon                                     | Intermediate           |
| T70                   | Adjustment to length of tendon                        | Intermediate           |
| T72                   | Other operations on sheath of tendon                  | Intermediate           |
| T74                   | Other operations on tendon                            | Intermediate           |

| <b>Procedure Code</b> | <b>Procedure Description</b>                                            | <b>Abbott Category</b> |
|-----------------------|-------------------------------------------------------------------------|------------------------|
| T79                   | Repair of muscle                                                        | Intermediate           |
| T87                   | Excision or biopsy of lymph node                                        | Intermediate           |
| T96                   | Other operations on soft tissue                                         | Intermediate           |
| T97                   | Repair of recurrent umbilical hernia                                    | Intermediate           |
| V21                   | Other operations on temporomandibular joint                             | Intermediate           |
| W03                   | Complex reconstruction of forefoot                                      | Intermediate           |
| W04                   | Complex reconstruction of hindfoot                                      | Intermediate           |
| W12                   | Angulation periarticular division of bone                               | Intermediate           |
| W13                   | Other periarticular division of bone                                    | Intermediate           |
| W26                   | Other closed reduction of fracture of bone                              | Intermediate           |
| W33                   | Other open operations on bone                                           | Intermediate           |
| W59                   | Fusion of joint of toe                                                  | Intermediate           |
| W69                   | Open operations on synovial membrane of joint                           | Intermediate           |
| W71                   | Other open operations on intra-articular structure                      | Intermediate           |
| W74                   | Other reconstruction of ligament                                        | Intermediate           |
| W75                   | Other open repair of ligament                                           | Intermediate           |
| W77                   | Stabilising operations on joint                                         | Intermediate           |
| W78                   | Release of contracture of joint                                         | Intermediate           |
| W79                   | Soft tissue operations on joint of toe                                  | Intermediate           |
| W81                   | Other open operations on joint                                          | Intermediate           |
| W82                   | Therapeutic endoscopic operations on semilunar cartilage                | Intermediate           |
| W83                   | Therapeutic endoscopic operations on other articular cartilage          | Intermediate           |
| W84                   | Therapeutic endoscopic operations on other joint structure              | Intermediate           |
| W85                   | Therapeutic endoscopic operations on cavity of knee joint               | Intermediate           |
| W87                   | Diagnostic endoscopic examination of knee joint                         | Intermediate           |
| W89                   | Other therapeutic endoscopic operations on other articular cartilage    | Intermediate           |
| W91                   | Other manipulation of joint                                             | Intermediate           |
| W92                   | Other operations on joint                                               | Intermediate           |
| X11                   | Amputation of toe                                                       | Intermediate           |
| A52                   | Therapeutic epidural injection                                          | Inclusive              |
| A54                   | Therapeutic spinal puncture                                             | Inclusive              |
| A55                   | Diagnostic spinal puncture                                              | Inclusive              |
| B32                   | Biopsy of breast                                                        | Inclusive              |
| D07                   | Clearance of external auditory canal                                    | Inclusive              |
| E06                   | Packing of cavity of nose                                               | Inclusive              |
| E25                   | Diagnostic endoscopic examination of pharynx                            | Inclusive              |
| E36                   | Diagnostic endoscopic examination of larynx                             | Inclusive              |
| E37                   | Diagnostic microendoscopic examination of larynx                        | Inclusive              |
| E49                   | Diagnostic fiberoptic endoscopic examination of lower respiratory tract | Inclusive              |
| E65                   | Diagnostic endoscopic examination of nasal cavity                       | Inclusive              |
| F10                   | Simple extraction of tooth                                              | Inclusive              |
| F12                   | Surgery on apex of tooth                                                | Inclusive              |
| F13                   | Restoration of tooth                                                    | Inclusive              |

| <b>Procedure Code</b> | <b>Procedure Description</b>                                                          | <b>Abbott Category</b> |
|-----------------------|---------------------------------------------------------------------------------------|------------------------|
| F14                   | Orthodontic operations                                                                | Inclusive              |
| F16                   | Other operations on tooth                                                             | Inclusive              |
| F20                   | Operations on gingiva                                                                 | Inclusive              |
| G15                   | Other therapeutic fibreoptic endoscopic operations on oesophagus                      | Inclusive              |
| G16                   | Diagnostic fibreoptic endoscopic examination of oesophagus                            | Inclusive              |
| G42                   | Other fibreoptic endoscopic extirpation of lesion of upper gastrointestinal tract     | Inclusive              |
| G43                   | Fibreoptic endoscopic extirpation of lesion of upper gastrointestinal tract           | Inclusive              |
| G44                   | Other therapeutic fibreoptic endoscopic operations on upper gastrointestinal tract    | Inclusive              |
| G45                   | Diagnostic fibreoptic endoscopic examination of upper gastrointestinal tract          | Inclusive              |
| G47                   | Intubation of stomach                                                                 | Inclusive              |
| G80                   | Diagnostic endoscopic examination of ileum                                            | Inclusive              |
| H20                   | Endoscopic extirpation of lesion of colon                                             | Inclusive              |
| H22                   | Diagnostic endoscopic examination of colon                                            | Inclusive              |
| H23                   | Endoscopic extirpation of lesion of lower bowel using fibreoptic sigmoidoscope        | Inclusive              |
| H24                   | Other therapeutic endoscopic operations on lower bowel using fibreoptic sigmoidoscope | Inclusive              |
| H25                   | Diagnostic endoscopic examination of lower bowel using fibreoptic sigmoidoscope       | Inclusive              |
| J38                   | Endoscopic incision of sphincter of Oddi                                              | Inclusive              |
| J40                   | Endoscopic retrograde placement of prosthesis in bile duct                            | Inclusive              |
| J41                   | Other therapeutic endoscopic retrograde operations on bile duct                       | Inclusive              |
| J43                   | Diagnostic endoscopic retrograde examination of bile duct and pancreatic duct         | Inclusive              |
| J53                   | Endoscopic ultrasound examination of bile duct                                        | Inclusive              |
| J74                   | Endoscopic ultrasound examination of pancreas                                         | Inclusive              |
| K49                   | Transluminal balloon angioplasty of coronary artery                                   | Inclusive              |
| K58                   | Diagnostic transluminal operations on heart                                           | Inclusive              |
| K61                   | Other cardiac pacemaker system                                                        | Inclusive              |
| L95                   | Diagnostic transluminal operations on vein                                            | Inclusive              |
| M14                   | Extracorporeal fragmentation of calculus of kidney                                    | Inclusive              |
| M30                   | Diagnostic endoscopic examination of ureter                                           | Inclusive              |
| M31                   | Extracorporeal fragmentation of calculus of ureter                                    | Inclusive              |
| M45                   | Diagnostic endoscopic examination of bladder                                          | Inclusive              |
| M77                   | Diagnostic endoscopic examination of urethra                                          | Inclusive              |
| Q03                   | Biopsy of cervix uteri                                                                | Inclusive              |
| Q12                   | Intrauterine contraceptive device                                                     | Inclusive              |
| Q13                   | Introduction of gametes into uterine cavity                                           | Inclusive              |
| Q14                   | Introduction of abortifacient into uterine cavity                                     | Inclusive              |
| Q18                   | Diagnostic endoscopic examination of uterus                                           | Inclusive              |
| Q48                   | Oocyte recovery                                                                       | Inclusive              |

| <b>Procedure Code</b> | <b>Procedure Description</b>                                         | <b>Abbott Category</b> |
|-----------------------|----------------------------------------------------------------------|------------------------|
| Q55                   | Other examination of female genital tract                            | Inclusive              |
| R14                   | Surgical induction of labour                                         | Inclusive              |
| R21                   | Forceps cephalic delivery                                            | Inclusive              |
| R22                   | Vacuum delivery                                                      | Inclusive              |
| R32                   | Repair of obstetric laceration                                       | Inclusive              |
| S07                   | Photodynamic therapy of skin                                         | Inclusive              |
| S08                   | Curettage of lesion of skin                                          | Inclusive              |
| S09                   | Photodestruction of lesion of skin                                   | Inclusive              |
| S13                   | Punch biopsy of skin                                                 | Inclusive              |
| S15                   | Other biopsy of skin                                                 | Inclusive              |
| S43                   | Removal of repair material from skin                                 | Inclusive              |
| S44                   | Removal of other inorganic substance from skin                       | Inclusive              |
| S45                   | Removal of other substance from skin                                 | Inclusive              |
| S53                   | Introduction of substance into skin                                  | Inclusive              |
| T46                   | Other drainage of peritoneal cavity                                  | Inclusive              |
| T81                   | Biopsy of muscle                                                     | Inclusive              |
| W36                   | Diagnostic puncture of bone                                          | Inclusive              |
| W66                   | Primary closed reduction of traumatic dislocation of joint           | Inclusive              |
| W90                   | Puncture of joint                                                    | Inclusive              |
| X41                   | Placement of ambulatory apparatus for compensation for renal failure | Inclusive              |
| X59                   | Anaesthetic without surgery                                          | Inclusive              |

Table S2. Search strategies used for targeted literature reviews for the 10 identified procedures

### **Cervical Decompression**

1. neck muscles.sh.
2. exp Neck/
3. whiplash injuries.sh.
4. neck.ti,ab.
5. exp Cervical Vertebrae/
6. or/1-5
7. exp Spinal Cord Compression/
8. exp Spinal Osteophytosis/
9. exp Spinal Nerve Roots/
10. exp Radiculopathy/
11. radiculopathy.mp.
12. myelopathy.mp.
13. radiculomyelopathy.mp.
14. myeloradiculopathy.mp.
15. or/7-14
16. exp Surgery/
17. exp Surgical Procedures, Operative/
18. surgery.mp.
19. surgical.mp.
20. or/16-19
21. and/6,15,20

### **Deep Brain Stimulation**

1. exp Deep Brain Stimulation/
2. (deep adj3 brain adj3 (stimulat\* or stimuli\* or stimulu\*)).mp.
3. or/1-2

### **Hip Replacement**

1. arthroplasty, replacement, hip/
2. Hip Prosthesis/
3. or/1-2
4. arthroplasty/ or arthroplasty, replacement/
5. Joint Prosthesis/
6. "Prostheses and Implants"/
7. (arthroplasty or replacement or prosthes#s).tw.
8. or/4-7
9. hip/ or hip joint/ or hip.tw.
10. 8 and 9
11. 3 or 10

### **Knee Replacement**

1. Arthritis/

2. arthrit\*.tw.
3. osteoarthr\*.tw.
4. gonarthrosis.tw.
5. arthralgia.tw.
6. felty\* syndrome.tw.
7. caplan\* syndrome.tw.
8. sjogren\* syndrome.tw.
9. sicca syndrome.tw.
10. still\* disease.tw.
11. bechterew\* disease.tw.
12. rheuma\*.tw.
13. or/1-12
14. knee/
15. knee joint/
16. knee\*.tw.
17. or/14-16
18. 13 and 17
19. knee arthroplasty/
20. knee prosthesis/
21. (knee\* adj3 (arthroplast\* or implant\* or replace\* or prosthe\* or endoprosthe\*)).tw.
22. or/19-21
23. "Prostheses and Implants"/
24. 17 and 23
25. 22 or 24
26. cementation/
27. "Bone cements"/
28. "Durapatite"/
29. (cement\* or uncement\* or Hydroxyapatite or Durapatite or Ingrowth or hybrid or porous\* or coat\* or press\$fit).tw.
30. or/26-29
31. 18 and 25 and 30

### **Obesity Surgery**

1. exp obesity/
2. Overweight/
3. over?weight.ti,ab.
4. over weight.ti,ab.
5. overeating.ti,ab.
6. over?eating.ti,ab.
7. exp Weight Loss/
8. weight loss.ti,ab.
9. weight reduc\$.ti,ab.
10. or/1-9
11. bariatric surg\$.ti,ab.
12. exp bariatric surgery/
13. (surg\$ adj5 bariatric).ti,ab.
14. anti?obesity surg\$.ti,ab.
15. antiobesity surg\$.ti,ab.
16. (obesity adj5 surgery).ti,ab.

17. (obesity adj5 surgical).ti,ab.
18. (gastroplasty or gastro?gastostomy or "gastric bypass" or "gastric surgery" or "restrictive surgery").ti,ab.
19. exp gastric bypass/
20. exp jejunioileal bypass/
21. jejunio?ileal bypass.ti,ab.
22. jejunioileal bypass.ti,ab.
23. gastrointestinal surg\$.ti,ab.
24. gastrointestinal diversion\$.ti,ab.
25. exp biliopancreatic diversion/
26. biliopancreatic diversion.ti,ab.
27. bilio?pancreatic diversion.ti,ab.
28. biliopancreatic bypass.ti,ab.
29. bilio?pancreatic bypass.ti,ab.
30. gastric band\$.ti,ab.
31. silicon band\$.ti,ab.
32. exp gastroenterostomy/
33. gastrectomy.ti,ab.
34. gastrectomy.ti,ab.
35. gastroplasty/
36. LAGB.ti,ab.
37. stomach stapl\$.ti,ab.
38. lap band\$.ti,ab.
39. lap\$band\$.ti,ab.
40. malabsorptive surg\$.ti,ab.
41. mason\$ procedure.ti,ab.
42. "Roux-en-Y".ti,ab.
43. Anastomosis, Roux-en-Y/
44. malabsorptive procedure\$.ti,ab.
45. duodenal switch\$.ti,ab.
46. stomach stapl\$.ti,ab.
47. obesity/su
48. exp Obesity, Morbid/su [Surgery]
49. or/11-48
50. and/10,49

### **Prostatectomy**

1. exp Prostatic Neoplasms/
2. exp Prostatic Intraepithelial Neoplasia/
3. (prostat\* adj3 (cancer\* or carcinoma\* or malignan\* or tumo?r\* or neoplas\* or adeno\* or intraepithelial)).tw.
4. exp prostate/
5. or/1-4
6. exp Prostatectomy/
7. prostatectom\*.tw.
8. (prostat\* adj3 (remov\* or resect\*)).tw.
9. prostate/su
10. (excis\* adj3 prostat\*).tw.
11. or/6-10

12. and/5,11

### **Radiofrequency Denervation**

1. dorsalgia.ti,ab.
2. exp Back Pain/
3. backache.ti,ab.
4. (lumbar adj pain).ti,ab.
5. coccyx.ti,ab.
6. coccydynia.ti,ab.
7. sciatica.ti,ab.
8. sciatic neuropathy/
9. spondylosis.ti,ab.
10. lumbago.ti,ab.
11. or/1-10
12. exp Spine/
13. discitis.ti,ab.
14. exp Spinal Diseases/
15. (disc adj degeneration).ti,ab.
16. (disc adj prolapse).ti,ab.
17. (disc adj herniation).ti,ab.
18. spinal fusion.sh.
19. (facet adj joints).ti,ab.
20. intervertebral disc.sh.
21. postlaminectomy.ti,ab.
22. arachnoiditis.ti,ab.
23. (failed adj back).ti,ab.
24. or/12-23
25. 11 or 24
26. exp Radio Waves/
27. exp Pulsed Radiofrequency Treatment/
28. radiofrequency.mp.
29. radio frequency.mp.
30. exp Electrocoagulation/
31. electrocoag\$.mp.
32. thermocoag\$.mp.
33. (neurotom\$ or neuroly\$).mp.
34. or/26-33
35. 25 and 34

### **Shoulder Replacement**

1. exp osteoarthritis/
2. osteoarthr\$.tw.
3. (degenerative adj2 arthritis).tw.
4. arthrosis.tw.
5. arthropat\$.tw.
6. rotator cuff arthro\$.tw.
7. or/1-6
8. Shoulder/



9. shoulder joint/
10. shoulder pain/
11. shoulder\$.tw.
12. or/8-11
13. (arthroplast\$ or hemiarthroplast\$ or (joint\$ adj2 replace\$)).tw.
14. (surface\$ adj replace\$).tw.
15. Arthroplasty, Replacement, Shoulder/
16. resurfac\$.tw.
17. RTSA.tw.
18. glenoid.tw.
19. glenosphere.tw.
20. exp "Prostheses and Implants"/
21. (glenoid adj2 component).tw.
22. (humor\$ adj2 component).tw.
23. endopro\$.tw.
24. reverse.tw.
25. or/13-24
26. 7 and 12 and 25

#### **Traumatic Dislocation**

1. Shoulder Dislocation/
2. exp Joint Dislocations/
3. (shoulder\$ adj3 (dislocat\* or sublux\* or instability or unstable)).tw.
4. (ankle\$ adj3 (dislocat\$ or sublux\$ or instability or unstable)).tw.
5. (glenohumeral adj (joint or instability or unstable)).tw.
6. (lesion\$1 adj (Hill Sachs or Bankart)).tw.
7. hill sachs lesion.tw.
8. or/1-7
9. Bankart.tw.
10. (arthroscop\* or repair\* or stabilis\* or stabiliz\* or reduc\*).tw.
11. exp Closed Fracture Reduction/ or exp Open Fracture Reduction/
12. or/9-11
13. 8 and 12

Table S3. The most common primary procedures and primary diagnoses recorded for each of the 10 included ‘restrictive’ procedures.

| Procedure code and description                                                     | Primary Procedure (% with this primary procedure)                                                                                                                                                                          | Primary Diagnosis (% with this primary diagnosis)                                    |
|------------------------------------------------------------------------------------|----------------------------------------------------------------------------------------------------------------------------------------------------------------------------------------------------------------------------|--------------------------------------------------------------------------------------|
| <i>Procedures with high variation (SCV 2018/19)</i>                                |                                                                                                                                                                                                                            |                                                                                      |
| G32 Connection of stomach to transposed jejunum                                    | Bypass of stomach by anastomosis of stomach to transposed jejunum (95%)                                                                                                                                                    | Obesity (92%)                                                                        |
| V48 Denervation of spinal facet joint of vertebra                                  | Radiofrequency controlled thermal denervation of spinal facet joint of lumbar vertebra (67%); Denervation of spinal facet joint of lumbar vertebra NEC (15%)                                                               | Dorsalgia (50%); Spondylosis (26%); Other intervertebral disc disorders (13%)        |
| W41 Total prosthetic replacement of knee joint not using cement                    | Primary total prosthetic replacement of knee joint not using cement (93%)                                                                                                                                                  | Gonarthrosis [arthrosis of knee] (85%)                                               |
| W93 Hybrid prosthetic replacement of hip joint using cemented acetabular component | Primary hybrid prosthetic replacement of hip joint using cemented acetabular component (92%)                                                                                                                               | Coxarthrosis [arthrosis of hip] (76%)                                                |
| <i>Procedures with high growth (2014/15-2018/19)</i>                               |                                                                                                                                                                                                                            |                                                                                      |
| A09 Neurostimulation of brain                                                      | Maintenance of neurostimulator in brain (49%); Implantation of neurotransmitter into brain (23%); Other specified neurostimulation of brain (12%)                                                                          | Parkinson's disease (42%); Fitting/Adjustment of other devices (15%); Dystonia (13%) |
| M61 Open excision of prostate                                                      | Total excision of prostate and capsule of prostate (83%)                                                                                                                                                                   | Malignant neoplasm of prostate (97%)                                                 |
| V22 Primary decompression operations on cervical spine                             | Primary anterior decompression of cervical spinal cord and fusion of joint of cervical spine (49%); Other specified primary decompression operations on cervical spine (17%); Primary foraminotomy of cervical spine (11%) | Cervical disc disorders (42%); Other spondylopathies (14%); Spondylosis (13%)        |
| W67 Secondary reduction of traumatic dislocation of joint                          | Secondary open reduction of fracture dislocation of joint and internal fixation NEC (63%); Remanipulation of traumatic dislocation of joint (15%); Remanipulation of fracture dislocation of joint (12%)                   | Fracture of lower leg, including ankle (52%)                                         |
| W94 Hybrid prosthetic replacement of hip joint using cemented femoral              | Primary hybrid prosthetic replacement of hip joint using cemented femoral component (95%)                                                                                                                                  | Coxarthrosis [arthrosis of hip] (79%)                                                |

component

|     |                                                                 |                                                                                                                                                                               |                                               |
|-----|-----------------------------------------------------------------|-------------------------------------------------------------------------------------------------------------------------------------------------------------------------------|-----------------------------------------------|
| W97 | Total prosthetic replacement of shoulder joint not using cement | Primary reverse polarity total prosthetic replacement of shoulder joint not using cement (74%); Primary total prosthetic replacement of shoulder joint not using cement (17%) | Other arthrosis (47%); Shoulder lesions (21%) |
|-----|-----------------------------------------------------------------|-------------------------------------------------------------------------------------------------------------------------------------------------------------------------------|-----------------------------------------------|

Table S4. Evidence of clinical and cost-effectiveness relating to highlighted procedures and related NICE guidance

| Procedure (Code)                               | Evidence of effectiveness?                                                                                                                                                                                             | Evidence of cost-effectiveness?                                                                                                                                   | NICE Guidance                                                                                                                                                                                             | Additional evidence |
|------------------------------------------------|------------------------------------------------------------------------------------------------------------------------------------------------------------------------------------------------------------------------|-------------------------------------------------------------------------------------------------------------------------------------------------------------------|-----------------------------------------------------------------------------------------------------------------------------------------------------------------------------------------------------------|---------------------|
| <i>Procedures with high variation</i>          |                                                                                                                                                                                                                        |                                                                                                                                                                   |                                                                                                                                                                                                           |                     |
| Bariatric surgical procedure (G32)             | Yes from systematic reviews, with debate about procedure options <sup>1, 2</sup> and limited evidence in children and adolescents <sup>3</sup>                                                                         | Yes compared to medical management <sup>4-6</sup>                                                                                                                 | People meeting specific criteria should be offered assessment for bariatric surgery CG189 <sup>7</sup> , QS127 <sup>8</sup>                                                                               | 9-11                |
| Procedure to alleviate pain in the spine (V48) | Not from systematic reviews. <sup>12, 13</sup> NICE reported that radiofrequency denervation is clinically effective at improving the pain score outcome for individuals that have severe low back pain. <sup>14</sup> | Limited; analysis undertaken by NICE indicated cost-effectiveness. <sup>14</sup> appendix N A Dutch RCT found the procedure was not cost-effective. <sup>15</sup> | Evidence of cost-effectiveness was viewed as insufficient for a firm recommendation NG59 <sup>14</sup>                                                                                                    | 16                  |
| Total knee replacement (uncemented) (W41)      | Yes from a systematic review. <sup>17</sup>                                                                                                                                                                            | Yes <sup>18</sup> though one study found that it was not cost-effective compared to partial knee replacement over a five-year period. <sup>19</sup>               | People should be offered a choice of total or partial knee replacement as total knee replacement may be cost-effective over a longer than five-year follow-up period NG157. <sup>20</sup>                 |                     |
| Hip replacement (acetabular component) (W93)   | Yes on the basis of observational data. <sup>21</sup>                                                                                                                                                                  | No evidence of cost-effectiveness for this type of implant. <sup>22</sup>                                                                                         | 'Prostheses for total hip replacement and resurfacing arthroplasty are recommended ... only if the prostheses have rates (or projected rates) of revision of 5% or less at 10 years' TA304. <sup>23</sup> |                     |

| Procedure (Code)                                       | Evidence of effectiveness?                                                                                                                                                                                               | Evidence of cost-effectiveness?                                                                                                      | NICE Guidance                                                                                                                                                                                                                                                                              | Additional evidence |
|--------------------------------------------------------|--------------------------------------------------------------------------------------------------------------------------------------------------------------------------------------------------------------------------|--------------------------------------------------------------------------------------------------------------------------------------|--------------------------------------------------------------------------------------------------------------------------------------------------------------------------------------------------------------------------------------------------------------------------------------------|---------------------|
| <i>Procedures with high growth</i>                     |                                                                                                                                                                                                                          |                                                                                                                                      |                                                                                                                                                                                                                                                                                            |                     |
| Deep brain stimulation for involuntary posturing (A09) | Limited from a systematic review, with uncertain impact on quality of life. <sup>24</sup>                                                                                                                                | Mixed for Parkinson's disease. <sup>25-27</sup> Very limited for dystonia. <sup>28, 29</sup>                                         | 'Consider deep brain stimulation for people with advanced Parkinson's disease whose symptoms are not adequately controlled by best medical therapy' NG71. <sup>30</sup> For tremor and dystonia 'evidence ... appears adequate to support the use of this procedure' IPG188. <sup>31</sup> | 32                  |
| Open removal of prostate (M61)                         | Yes from a systematic review, although with potential drawbacks. <sup>33</sup>                                                                                                                                           | Doubtful but may emerge with longer follow-up <sup>34-37</sup>                                                                       | surgery or radiotherapy recommended for intermediate or high-risk prostate cancer NG131 <sup>38</sup> ; IPG193 <sup>39</sup>                                                                                                                                                               |                     |
| Spine surgical procedure (V22)                         | Not from systematic reviews. <sup>40, 41</sup>                                                                                                                                                                           | No evidence compared to medical management. One surgical procedure was found to be cost-effective compared to another. <sup>42</sup> | Refer people with axial spondyloarthritis to a complex spinal surgery service if two conditions apply NG65. <sup>43</sup>                                                                                                                                                                  | 44, 45              |
| Joint surgical procedure (W67)                         | Not from a systematic review for ankles, <sup>46</sup> and limited for shoulders. <sup>47</sup> Trial evidence does not indicate effectiveness of surgical management of ankle or shoulder dislocation. <sup>48-50</sup> | No evidence compared to medical management. <sup>50, 51</sup>                                                                        | Reported criterion for transferring people with a failed closed reduction of a hip joint to a specialist centre NG37. <sup>52</sup>                                                                                                                                                        |                     |

| Procedure (Code)                          | Evidence of effectiveness?                            | Evidence of cost-effectiveness?                                           | NICE Guidance                                                                                                                                                                                             | Additional evidence |
|-------------------------------------------|-------------------------------------------------------|---------------------------------------------------------------------------|-----------------------------------------------------------------------------------------------------------------------------------------------------------------------------------------------------------|---------------------|
| Hip replacement (femoral component) (W94) | Yes on the basis of observational data. <sup>21</sup> | No evidence of cost-effectiveness for this type of implant. <sup>22</sup> | ‘Prostheses for total hip replacement and resurfacing arthroplasty are recommended ... only if the prostheses have rates (or projected rates) of revision of 5% or less at 10 years’ TA304. <sup>23</sup> |                     |
| Shoulder replacement (W97)                | Not from systematic reviews. <sup>53-55</sup>         | No evidence compared to medical management. <sup>56</sup>                 | Unable to make recommendations for practice because of a lack of evidence NG157. <sup>20</sup>                                                                                                            |                     |

## References

1. Colquitt JL, Pickett K, Loveman E, et al. Surgery for weight loss in adults. *Cochrane Db Syst Rev* 2014.
2. Picot J, Jones J, Colquitt JL, et al. Weight Loss Surgery for Mild to Moderate Obesity: A Systematic Review and Economic Evaluation. *Obes Surg* 2012; 22: 1496-1506.
3. Ells LJ, Mead E, Atkinson G, et al. Surgery for the treatment of obesity in children and adolescents (Review). *Cochrane Db Syst Rev* 2015.
4. Gulliford MC, Charlton J, Prevost T, et al. Costs and Outcomes of Increasing Access to Bariatric Surgery: Cohort Study and Cost-Effectiveness Analysis Using Electronic Health Records. *Value Health* 2017; 20: 85-92.
5. Tang Q, Sun ZP, Zhang NW, et al. Cost-Effectiveness of Bariatric Surgery for Type 2 Diabetes Mellitus A Randomized Controlled Trial in China. *Medicine* 2016; 95.
6. Pollock RF, Muduma G and Valentine WJ. Evaluating the cost-effectiveness of laparoscopic adjustable gastric banding versus standard medical management in obese patients with type 2 diabetes in the UK. *Diabetes Obes Metab* 2013; 15: 121-129.
7. National Institute for Health and Care Excellence. Obesity: identification, assessment and management (CG189), <https://www.nice.org.uk/guidance/cg189> (2014).

8. National Institute for Health and Care Excellence. Obesity: clinical assessment and management (QS127), <https://www.nice.org.uk/guidance/qs127> (2016).
9. Gounder ST, Wijayanayaka D, Murphy R, et al. Costs of bariatric surgery in a randomised control trial (RCT) comparing Roux en Y gastric bypass vs sleeve gastrectomy in morbidly obese diabetic patients. *New Zeal Med J* 2016; 129: 43-52.
10. Darabi S, Talebpour M, Zeinodini A, et al. Laparoscopic gastric plication versus mini-gastric bypass surgery in the treatment of morbid obesity: A randomized clinical trial. *Surg Obes Relat Dis* 2013; 9: 914-919.
11. Rogers CA, Reeves BC, Byrne J, et al. Adaptation of the By-Band randomized clinical trial to By-Band-Sleeve to include a new intervention and maintain relevance of the study to practice. *Brit J Surg* 2017; 104: 1207-1214.
12. Maas ET, Ostelo RWJG, Niemisto L, et al. Radiofrequency denervation for chronic low back pain. *Cochrane Db Syst Rev* 2015.
13. Niemisto L, Kalso E, Malmivaara A, et al. Radiofrequency denervation for neck and back pain: A systematic review within the framework of the Cochrane Collaboration Back Review Group. *Spine* 2003; 28: 1877-1888.
14. National Institute for Health and Care Excellence. Low back pain and sciatica in over 16s: assessment and management (NG59), <https://www.nice.org.uk/guidance/ng59> (2016).
15. Maas ET, Juch JNS, Ostelo RWJG, et al. Cost-Effectiveness of Radiofrequency Denervation for Patients With Chronic Low Back Pain: The MINT Randomized Clinical Trials. *Value Health* 2020; 23: 585-594.
16. Price C, Reeves B, Ahmad A, et al. Radiofrequency denervation of the lumbar facet joints: guidelines for the RADICAL randomised controlled trial. *Brit J Pain* 2020.
17. Nakama GY, Peccin MS, Almeida GJM, et al. Cemented, cementless or hybrid fixation options in total knee arthroplasty for osteoarthritis and other non-traumatic diseases. *Cochrane Db Syst Rev* 2012.
18. Dakin H, Gray A, Fitzpatrick R, et al. Rationing of total knee replacement: a cost-effectiveness analysis on a large trial data set. *Bmj Open* 2012; 2.
19. Beard DJ, Davies LJ, Cook JA, et al. The clinical and cost-effectiveness of total versus partial knee replacement in patients with medial compartment osteoarthritis (TOPKAT): 5-year outcomes of a randomised controlled trial. *Lancet* 2019; 394: 746-756.
20. National Institute for Health and Care Excellence. Joint replacement (primary): hip, knee and shoulder (NG157), [www.nice.org.uk/guidance/ng157](http://www.nice.org.uk/guidance/ng157) (2020).
21. Fitzpatrick R SE, Sculpher M, et al. . Primary total hip replacement surgery: a systematic review of outcomes and modelling of cost-effectiveness associated with different prostheses. *Health Technol Assess* 1998; 2: 1–64.
22. Fawsitt C TH, Hunt L, et al. Choice of Prosthetic Implant Combinations in Total Hip Replacement: Cost-Effectiveness Analysis Using UK and Swedish Hip Joint Registries Data. *Value Health* 2019; 22: 303-312.
23. National Institute for Health and Care Excellence. Total hip replacement and resurfacing arthroplasty for end-stage arthritis of the hip (TA304), [www.nice.org.uk/guidance/ta304](http://www.nice.org.uk/guidance/ta304) (2014).
24. Rodrigues FB, Duarte GS, Prescott D, et al. Deep brain stimulation for dystonia. *Cochrane Db Syst Rev* 2019.

25. McIntosh E, Gray A, Daniels J, et al. Cost-utility analysis of deep brain stimulation surgery plus best medical therapy versus best medical therapy in patients with Parkinson's: Economic evaluation alongside the PD SURG trial. *Movement Disord* 2016; 31: 1173-1182.
26. Stroupe KT, Weaver FM, Cao LS, et al. Cost of Deep Brain Stimulation for the Treatment of Parkinson's Disease by Surgical Stimulation Sites. *Movement Disord* 2014; 29: 1666-1674.
27. Eggington S, Valdeoriola F, Chaudhuri KR, et al. The cost-effectiveness of deep brain stimulation in combination with best medical therapy, versus best medical therapy alone, in advanced Parkinson's disease. *J Neurol* 2014; 261: 106-116.
28. Dang T RD, Connelly L. Cost-Effectiveness of Deep Brain Stimulation With Movement Disorders: A Systematic Review. *Mov Disord Clin Pract* 2019; 6: 348-358.
29. Yianni J GA, McIntosh E, et al. The costs and benefits of deep brain stimulation surgery for patients with dystonia: an initial exploration. *Neuromodulation* 2005; 8: 155–161.
30. National Institute for Health and Care Excellence. Parkinson's disease in adults (NG71), [www.nice.org.uk/guidance/ng71](http://www.nice.org.uk/guidance/ng71) (2017).
31. National Institute for Health and Care Excellence. Deep brain stimulation for tremor and dystonia (excluding Parkinson's disease) (IPG188), [www.nice.org.uk/guidance/ipg188](http://www.nice.org.uk/guidance/ipg188) (2006).
32. Williams A, Gill S, Varma T, et al. Deep brain stimulation plus best medical therapy versus best medical therapy alone for advanced Parkinson's disease (PD SURG trial): a randomised, open-label trial. *Lancet Neurol* 2010; 9: 581-591.
33. Vernooij RWM, Lancee M, Cleves A, et al. Radical prostatectomy versus deferred treatment for localised prostate cancer. *Cochrane Db Syst Rev* 2020.
34. Noble SM, Garfield K, Lane JA, et al. The ProtecT randomised trial cost-effectiveness analysis comparing active monitoring, surgery, or radiotherapy for prostate cancer. *Brit J Cancer* 2020; 123: 1063-1070.
35. Ramsay C, Pickard R, Robertson C, et al. Systematic review and economic modelling of the relative clinical benefit and cost-effectiveness of laparoscopic surgery and robotic surgery for removal of the prostate in men with localised prostate cancer. *Health Technol Assess* 2012; 16: 1-313. 2012/11/07.
36. Sharma V, Wymer KM, Borah BJ, et al. Cost-Effectiveness of Active Surveillance, Radical Prostatectomy and External Beam Radiotherapy for Localized Prostate Cancer: An Analysis of the ProtecT Trial. *J Urology* 2019; 202: 966-974.
37. Andersson SO, Andren O, Lyth J, et al. Managing localized prostate cancer by radical prostatectomy or watchful waiting: Cost analysis of a randomized trial (SPCG-4). *Scand J Urol Nephrol* 2011; 45: 177-183.
38. National Institute for Health and Care Excellence. Prostate cancer: diagnosis and management (NG131), [www.nice.org.uk/guidance/ng131](http://www.nice.org.uk/guidance/ng131) (2019).
39. National Institute for Health and Care Excellence. Laparoscopic radical prostatectomy (IPG193), [www.nice.org.uk/guidance/ipg193](http://www.nice.org.uk/guidance/ipg193) (2006).
40. Nikolaidis I, Fouyas IP, Sandercock PAG, et al. Surgery for cervical radiculopathy or myelopathy. *Cochrane Db Syst Rev* 2010.
41. Jacobs W, Willems PC, van Limbeek J, et al. Single or double-level anterior interbody fusion techniques for cervical degenerative disc disease. *Cochrane Db Syst Rev* 2011.



42. Ament JD, Yang Z, Nunley P, et al. Cost-effectiveness of Cervical Total Disc Replacement vs Fusion for the Treatment of 2-Level Symptomatic Degenerative Disc Disease (vol 149, 1231, 2014). *Jama Surg* 2014; 149: 1295-1295.
43. National Institute for Health and Care Excellence. Spondyloarthritis in over 16s: diagnosis and management (NG65), <https://www.nice.org.uk/guidance/NG65> (2017).
44. Kotter M, Kalsi-Ryan S, Milligan J, et al. FUSION 4 DCM: Posterior decompressive surgery with fixation for multi-level degenerative cervical myelopathy, <https://fundingawards.nihr.ac.uk/award/NIHR131243> (2021-2027).
45. Thomson S AG, Selvanathan S, et al. . Posterior cervical foraminotomy versus anterior cervical discectomy for Cervical Brachialgia: the FORVAD RCT. *Health Technol Assess* 2023; 27: 1-228.
46. al. DCA-KHVM. Surgical versus conservative interventions for treating ankle fractures in adults. *Cochrane Db Syst Rev* 2012.
47. Handoll HH, Almayyah MA and Rangan A. Surgical versus non-surgical treatment for acute anterior shoulder dislocation. *Cochrane Database Syst Rev* 2004.
48. Keene DJ, Mistry D, Nam J, et al. The Ankle Injury Management (AIM) trial: a pragmatic, multicentre, equivalence randomised controlled trial and economic evaluation comparing close contact casting with open surgical reduction and internal fixation in the treatment of unstable ankle fractures in patients aged over 60 years. *Health Technol Assess* 2016; 20: 1-158. 2016/10/14.
49. Murray IR, Robinson PG, Goudie EB, et al. Open Reduction and Tunneled Suspensory Device Fixation Compared with Nonoperative Treatment for Type-III and Type-IV Acromioclavicular Joint Dislocations. *J Bone Joint Surg Am* 2018; 100: 1912-1918.
50. Slobogean GP, Marra CA, Sadatsafavi M, et al. Is Surgical Fixation for Stress-Positive Unstable Ankle Fractures Cost Effective? Results of a Multicenter Randomized Control Trial. *Journal of Orthopaedic Trauma* 2012; 26: 652-658. DOI: 10.1097/BOT.0b013e31824aec42.
51. White TO, Bugler KE, Appleton P, et al. A prospective randomised controlled trial of the fibular nail versus standard open reduction and internal fixation for fixation of ankle fractures in elderly patients. *Bone Joint J* 2016; 98b: 1248-1252.
52. National Institute for Health and Care Excellence. Fractures (complex): assessment and management (NG37), <https://www.nice.org.uk/guidance/ng37> (2016).
53. Christie A, Dagfinrud H, Engen Matre K, et al. Surgical interventions for the rheumatoid shoulder. *Cochrane Db Syst Rev* 2010.
54. Craig RS, Goodier H, Singh JA, et al. Shoulder replacement surgery for osteoarthritis and rotator cuff tear arthropathy. *Cochrane Db Syst Rev* 2020.
55. Singh JA, Sperling J, Buchbinder R, et al. Surgery for shoulder osteoarthritis. *Cochrane Db Syst Rev* 2010.
56. Handoll H, Brealey S, Rangan A, et al. The ProFHER (PROximal Fracture of the Humerus: Evaluation by Randomisation) trial - a pragmatic multicentre randomised controlled trial evaluating the clinical effectiveness and cost-effectiveness of surgical compared with non-surgical treatment for proximal fracture of the humerus in adults. *Health Technol Asses* 2015; 19: 1-+.

Figure S1. Variation in standardised rates of connection of stomach to transposed jejunum (G32) by CCG in 2018/19

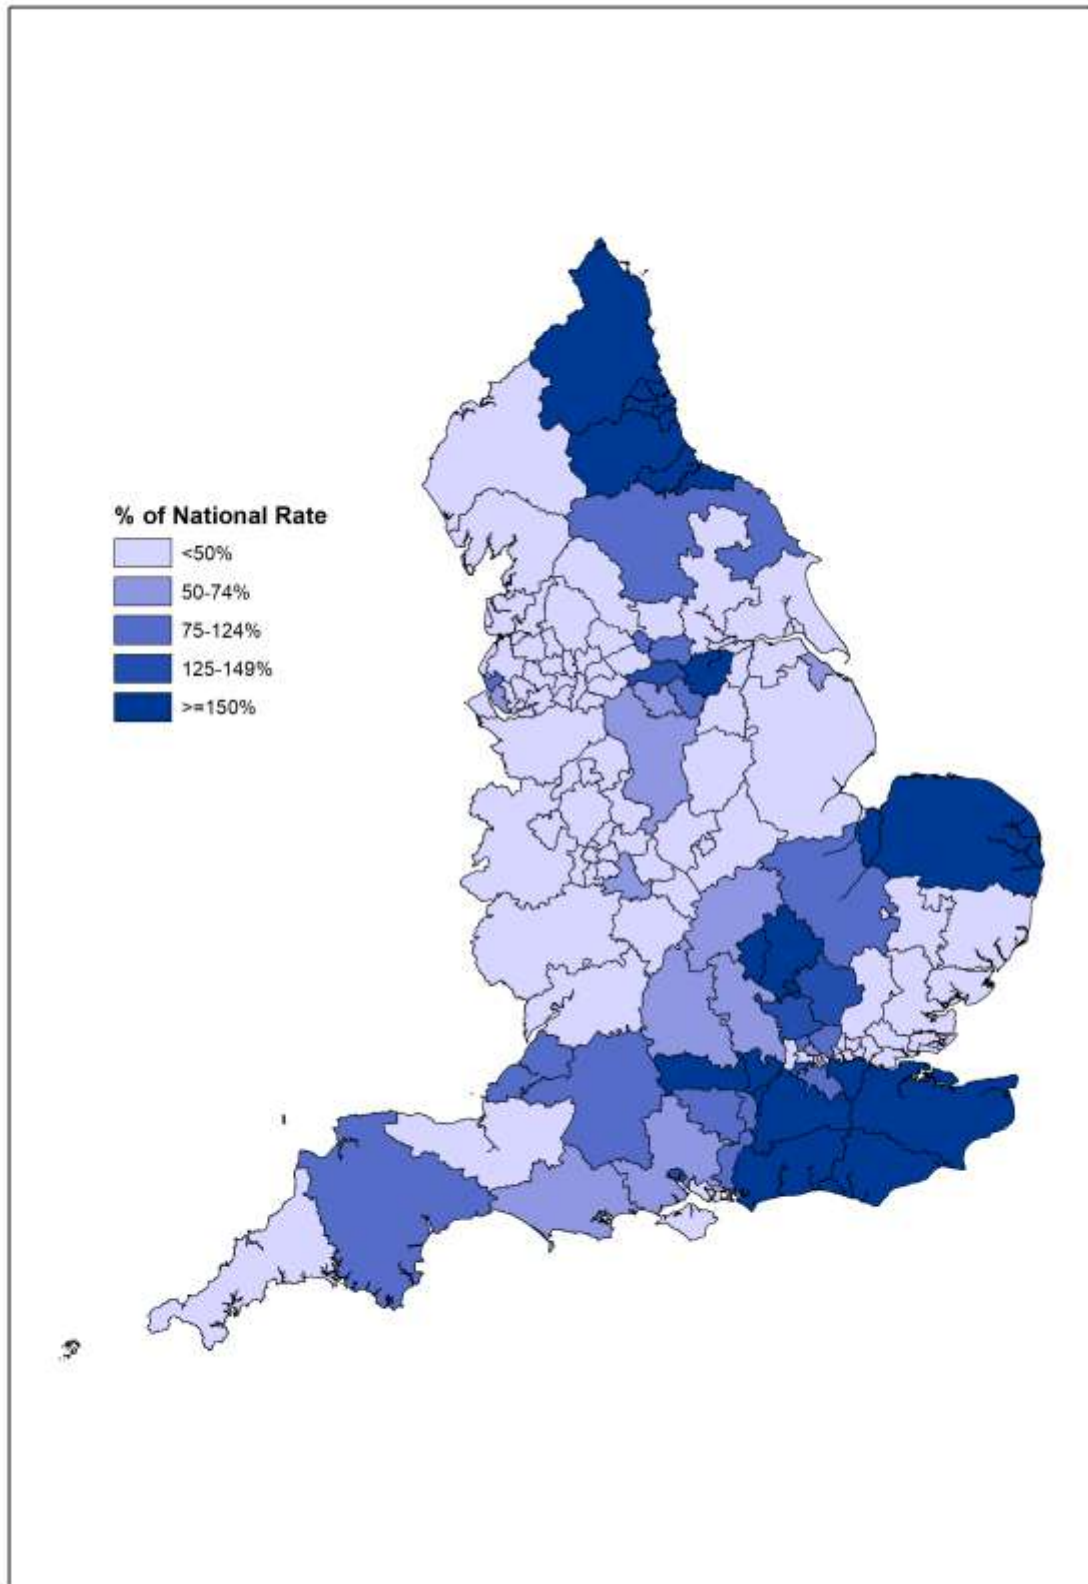

Figure S2. Variation in standardised rates of denervation of spinal facet joint of vertebra (V48) by CCG in 2018/19

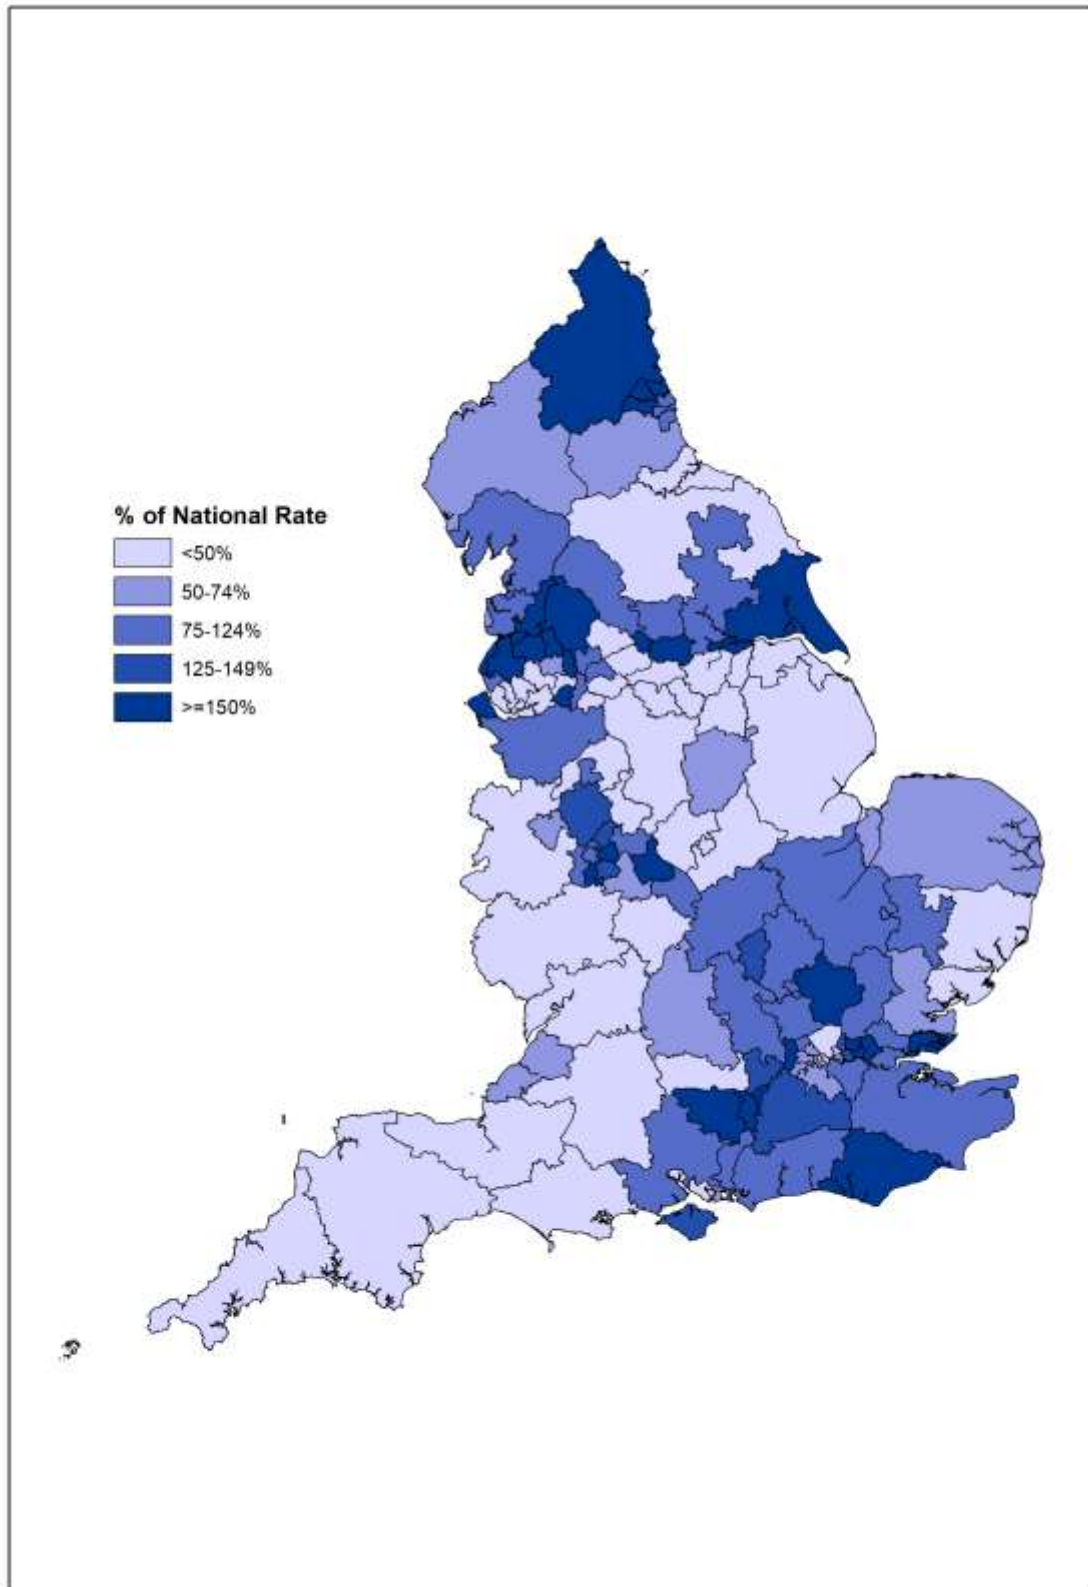

Figure S3. Variation in standardised rates of total prosthetic replacement of knee joint not using cement (W41) by CCG in 2018/19

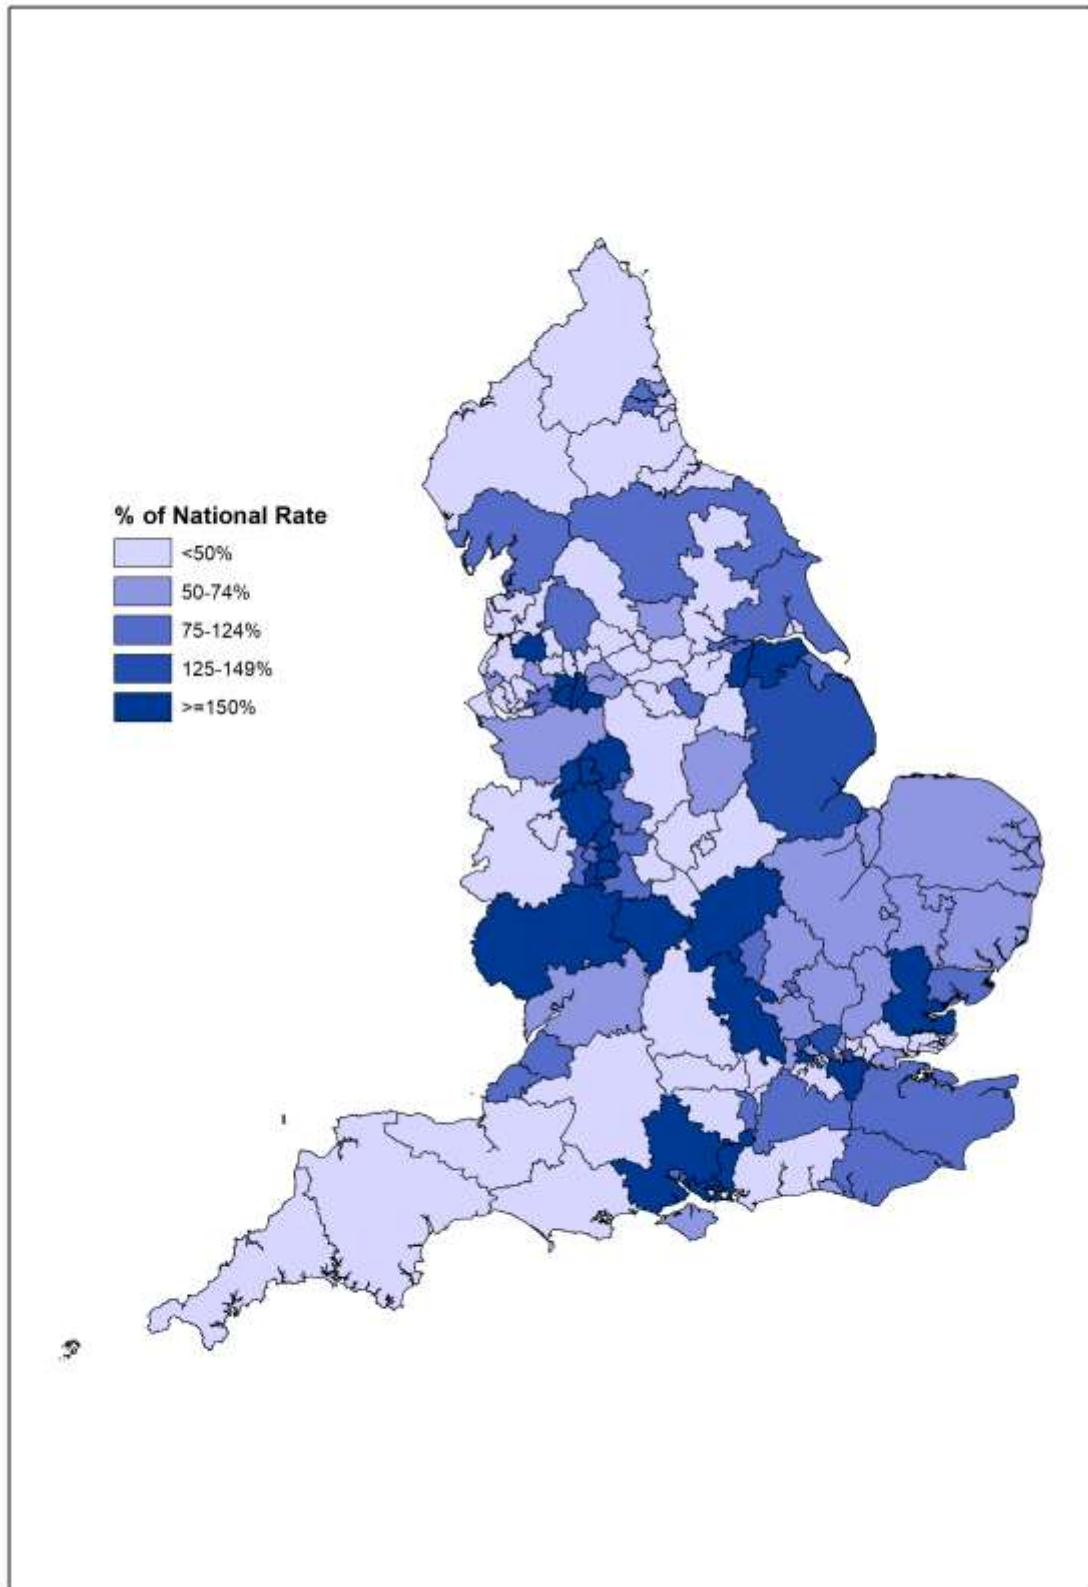

Figure S4. Variation in standardised rates of hybrid prosthetic replacement of hip joint using cemented acetabular component (W93) by CCG in 2018/19

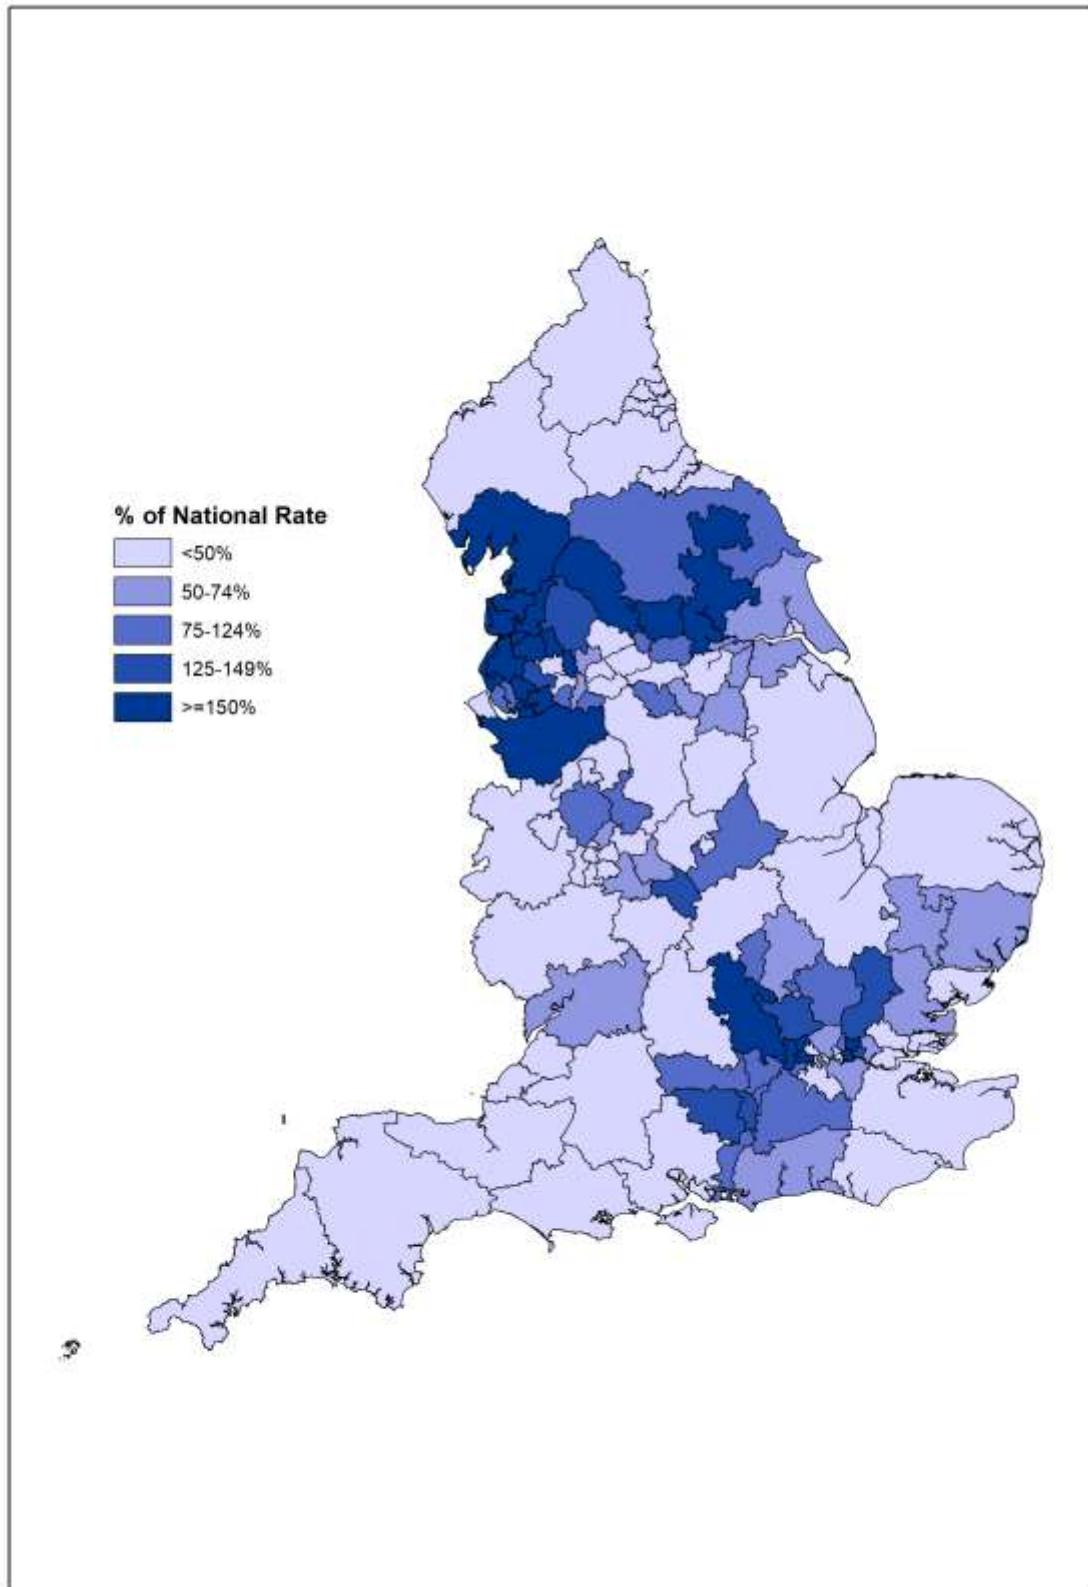

Figure S5. National procedure rates (2018/19), growth in procedure rates (2014/15-2018/19), and geographic variation in procedure rates (2018/19) for 'inclusive' procedures.

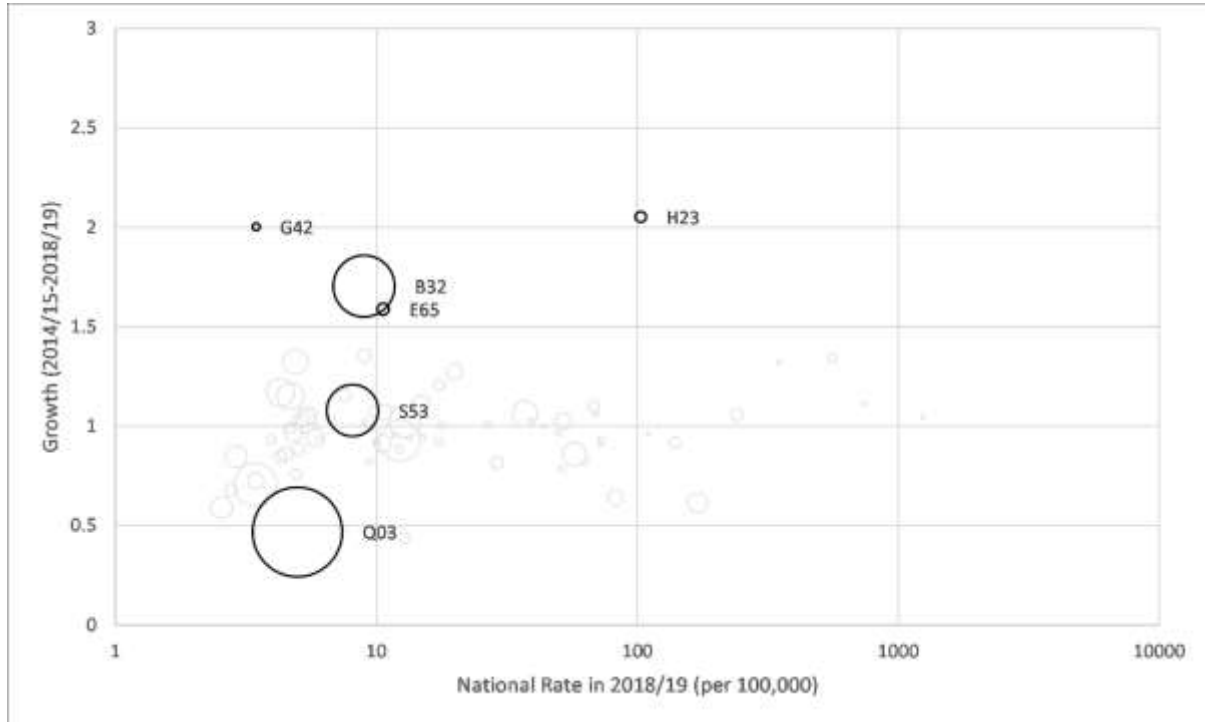

Note: Bubble size is proportional to systematic component of variance (2018/19). When growth is <1 the procedure rate has reduced over the 5 years. Highlighted entries are either top 5% in terms of growth (>1.59) or geographic variance in 2018/19 (>4.05). Procedure code labels are to the right of the corresponding circle. National rate in 2018/19 is represented on a log scale. G42 - Other fiberoptic endoscopic extirpation of lesion of upper gastrointestinal tract; H23 - Endoscopic extirpation of lesion of lower bowel using fiberoptic sigmoidoscope; B32 - Biopsy of breast; E65 - Diagnostic endoscopic examination of nasal cavity; S53 - Introduction of substance into skin; Q03 - Biopsy of cervix uteri. For B32, S53, and Q03, we are aware that variation is substantially reduced if inpatient and outpatient data are combined, suggesting there is some choice in which setting the procedures are carried out.



Figure S6. National procedure rates (2018/19), growth in procedure rates (2014/15-2018/19), and geographic variation in procedure rates (2018/19) for ‘intermediate’ procedures.

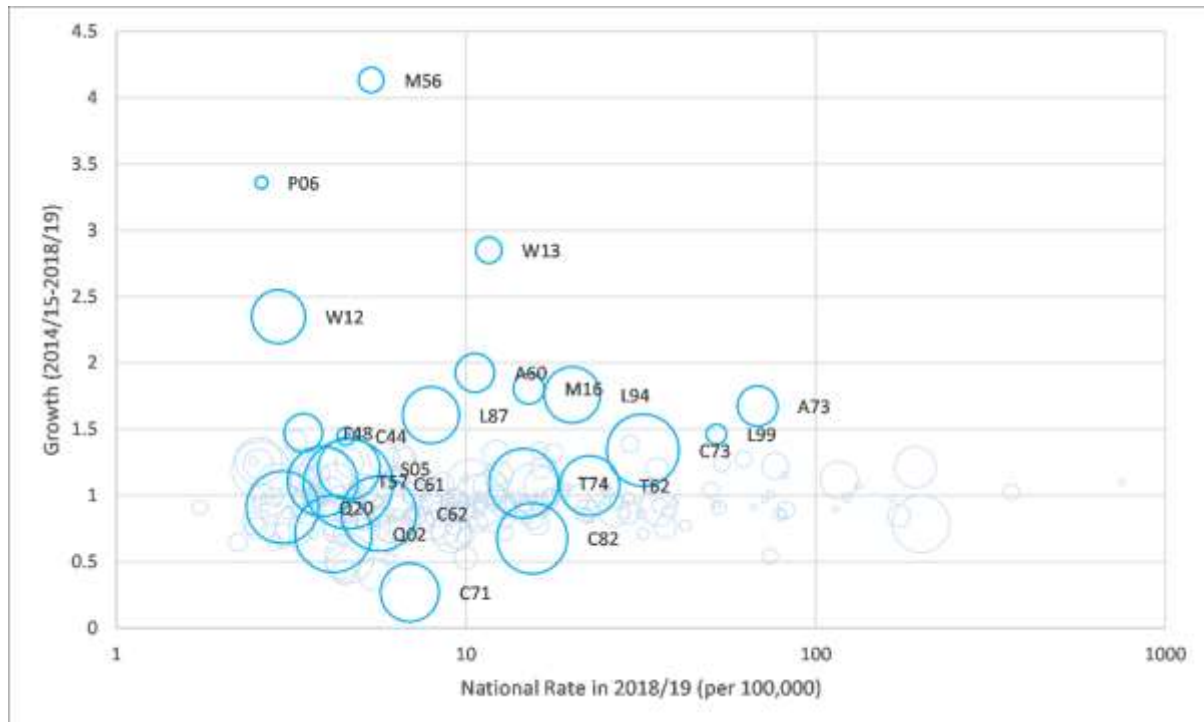

Note: Bubble size is proportional to systematic component of variance (2018/19). When growth is <1 the procedure rate has reduced over the 5 years. Highlighted entries are either the top 5% in terms of growth (>1.45) or geographic variance in 2018/19 (>1.79). Procedure code labels are to the right of the corresponding circle. National rate in 2018/19 is represented on a log scale. M56 - Therapeutic endoscopic operations on outlet of female bladder; P06 - Extirpation of lesion of vulva; W13 - Other periarticular division of bone; W12 - Angulation periarticular division of bone; A60 - Destruction of peripheral nerve; A73 - Other operations on peripheral nerve; C44 - Other plastic operations on cornea; C61 - Other operations on trabecular meshwork of eye; C62 - Incision of iris; C71 - Extracapsular extraction of lens; C73 - Incision of capsule of lens; C82 - Destruction of lesion of retina; F48 - Other operations on salivary gland; K73 - Other cardiac pacemaker system introduced through vein; L87 - Other operations on varicose vein of leg; L94 - Therapeutic transluminal operations on vein; L99 - Other therapeutic transluminal operations on vein; M16 - Other operations on kidney; Q02 - Destruction of lesion of cervix uteri; Q20 - Other operations on uterus; S05 - Microscopically controlled excision of lesion of skin; T57 - Other operations on fascia; T62 - Operations on bursa; T74 - Other operations on tendon

Methods S1. Systematic component of variance.

Equation 1. Formula for systematic component of variance.

$$SCV = \frac{\sum_i \frac{(o_i - e_i)^2}{e_i^2} - \sum_i \frac{1}{e_i^2}}{k}$$

, where  $o_i$  is the observed number of procedures in CCG  $i$ ,  $e_i$  is the expected number of procedures in CCG  $i$ , and  $k$  is the number of CCGs. The SCV is equivalent to variance in the standardised incidence ratios with random variation removed, and is a measure of dispersion that takes into account the spread of all datapoints. It should not be affected by baseline counts/rates for a procedure, so can be compared across different procedures in the same region (e.g. England).<sup>23</sup> For additional information on geographical variation, we provided the standardised CCG procedure rate at the 95<sup>th</sup> percentile and the standardised CCG procedure rate at the 5<sup>th</sup> percentile (when ordered from lowest to highest).
